# Supplementary material for: Posting on Social-Media Undermines Academic Performance and Well-Being
Source: Research Square preprint supplement (doi:10.21203/rs.3.rs-3805219/v1), 2024-01-05
Supplement: Supplementary file 1 [file 0f651f9940beb2cffc6d34bc.docx]

**Supplementary Information**

**Supplementary Methods**

**Note 1:** **Further information on the Participants section of Experiments 1 and 2**

Additional inclusion criteria in both experiments included being undergraduate social science students and using a smartphone with an Android operating system (given the monitoring software requirements). To diminish attrition, inclusion criteria also required that prior to the experiment participants agreed to: post and scroll on their social-media accounts during the experiment; install tracking software on their phones and computers and share their data at the end of the experiments; disconnect from their social-media accounts for 24 hours (given the experimental procedure in which right after the experiments, the participants' social-media accounts were deactivated for 24 hours).

**Note 2:** **Further information on the Procedure section of Experiments 1 and 2**

One day prior to the experiments, participants provided their written informed consent via Qualtrics1. After providing a consent form, participants installed an application on their phones and a Chrome extension on their personal computers that unobtrusively and accurately monitored their devices’ usage during the experiments.

Both experiments were created using Qualtrics1. Experimental instructions were administered via pre-recorded video clips. In these video clips, participants saw short written experimental instructions accompanied by detailed auditory explanations.

**Note 3:** **Further information on the Social-media usage experimental manipulation subsection of Experiments 1 and 2**

After giving instructions regarding the experimental manipulation and immediately prior to starting the experimental manipulation, we ensured participants' understanding of the instructions, by asking them to respond to three questions: (A) Please write down which actions you are asked to perform on your social-media account (where a correct response for the posting/scrolling conditions was to create/consume social-media content respectively); (B) Please write down the minimum number of actions required to perform on your social-media account (where a correct response was to create/consume three social-media contents for the posting/scrolling condition respectively); (C) Please write down which actions you are asked to avoid on your social-media account (where a correct response for the posting/scrolling conditions was to consume/create social-media content respectively). A judge who read all answers confirmed that all participants understood the experimental manipulation instructions.

For the experimental manipulation part, participants in Experiment 1 were allowed to post or scroll through social-media content on their smartphones or their computers. Participants in Experiment 2 were allowed to post or scroll through social-media content only on their smartphones because it is not possible to post content on Instagram via a computer.

To verify that during the experimental manipulation participants were mainly in their social-media accounts, we used continuous usage data from participants’ smartphones and computers (using “APP Usage”2 and Chrome extension “TimeYourWeb”3). The data obtained confirmed that during the six-minute experimental manipulation, participants in Experiment 1 were on their Facebook accounts for an average of 05:14 minutes (SD = 02:10 minutes), and participants in Experiment 2 spent an average of 05:27 minutes on their Instagram accounts (SD = 01:54 minutes).

**Table 1: Social-media usage experimental manipulation instructions of Experiments 1 and 2**

Table 1 presents the experimental manipulation instructions in Experiments 1 and 2 for the posting and scrolling conditions. The instructions in both experiments were similar, with minor modifications to fit each platform (Facebook in Experiment 1 and Instagram in Experiment 2).

| **Manipulation instructions of Experiments 1 and 2** | |
| --- | --- |
| **Posting Instruction** | **Scrolling Instruction** |
| Many factors contribute to Facebook’s/Instagram’s popularity, but some studies suggest that one of the key reasons for Facebook’s/Instagram’s popularity is that it **enables users to easily create and share content with their social world.**  **For example, Facebook/Instagram enables users to upload status, photos, stories, videos, etc., and share them with their social world.**  Many people report that they can easily connect to and experience their social world **by posting**.  For the next 6 minutes, we ask you to use Facebook/Instagram only for **posting.**  Specifically,for **creating and publicly publishing personal and original content.**  For example, **you can post original images, change your profile picture, upload videos, stories, or verbal content.**  Note that you are asked to **post** 3 contents.  In addition, we ask you to use Facebook/Instagram only for **posting** and refrain from other activities such as **scrolling through your news feed, look at your friends’ profiles, enter groups or pages you follow** (relevant only on Facebook)**, and view pictures.**  Refrain also from sharing non-original content, commenting, and reacting to friends, and clicking on any links that will lead to non-Facebook/Instagram sites.  **Remember to only create and publicly publish personal and original content and avoid sharing content created by others, or posting meaningless updates like 'Today is Wednesday and it's 9 am'** | Many factors contribute to Facebook’s/Instagram’s popularity, but some studies suggest that one of the key reasons for Facebook’s/Instagram’s popularity is that it **allows people to browse their social world and stay updated.**  **For example, Facebook/Instagram enables users to scroll through news feed, looking at friends’ posts, pictures, videos, etc.**  Many people report that they can easily connect to and experience their social world through **scrolling**.  For the next 6 minutes, we ask you to use Facebook/Instagram only for **scrolling.**  Specifically, for **viewing content created by others.**  For example, **you can scroll through your news feed, look at your friends’ profiles, enter groups or pages you follow** (relevant only on Facebook)**, and view pictures.**  Note that you are asked to **scroll through (at least)** 3 contents.  In addition, we ask you to use Facebook/Instagram only for **scrolling** and refrain from other activities such as **posting original images, change your profile picture, upload videos, stories, or verbal content.**  Refrain also from sharing non-original content, commenting, and reacting to friends, and clicking on any links that will lead to non-Facebook/Instagram sites.  **Remember to only view content created by others and avoid creating and publicly publishing content yourself** |
| Note: Bolded text reflects aspects of the manipulation that differ between conditions | |

**Note 4:** **Further information on the Academic preparation self-control context subsection of Experiments 1 and 2**

In order to emphasize the importance of reading the academic text in the academic preparation self-control context, participants were instructed to carefully read the text to maximally prepare for a novel comprehension test. The test was described as highly predictive of future academic success, even though, in reality, it holds no such predictive capabilities.

The academic text was about the establishment of forestry resources4 and included 9 pages with approximately 5 paragraphs on each page. In order to enhance the saliency of social-media, during text reading we presented Facebook (Experiment 1) or Instagram (Experiment 2) gifs and sounds. Specifically, five Facebook (Experiment 1) or Instagram (Experiment 2) gifs were presented alongside fixed paragraphs of the text (i.e., alongside paragraphs 2, 16, 23, 39, 48), and 3 different Facebook (Experiment 1) or Instagram (Experiment 2) familiar sounds of notifications were heard 6 times (each sound twice) at fixed minutes (04:36, 10:00, 15:23, 20:00, 24:36, 30:00).

To increase the temptation of using social-media instead of reading the academic text, both social-media usage and text reading were performed on participants’ computers. Specifically, to allow easy navigation between the academic text and social-media account, participants were asked to open two web pages in the Chrome browser on their computers: one for the academic text and the other for their social-media account.

**Note 5: Further information on the Procrastinatory social-media usage measurement subsection of Experiments 1 and 2**

The accurate measurement of the two measures that constitute procrastinatory social-media usage (i.e., number of visits and time spent on social-media instead of studying) was obtained using a highly sensitive "TimeYourWeb" software3). This software is automatically activated each time participants navigate to Facebook (Experiment 1) or Instagram (Experiment 2). Specifically, the software automatically stops its counter when participants navigate out of their social-media web page or when the social-media web page is not active (i.e., when no mouse or keyboard activity is detected for 30 seconds).

**Note 6: Further information on the Academic performance measurement subsection of Experiments 1 and 2**

To enhance the saliency of procrastinatory social-media usage, during the comprehension test, three Facebook (Experiment 1) or Instagram (Experiment 2) familiar notification sounds were heard 6 times (i.e., during the presentation of questions: 2, 4, 8, 11, 16, 18). To minimize the influence of individual differences in comprehension abilities, all test items were straightforward and focused on remembering details that were explicitly written in the text.

**Note 7: Additional exploratory measures in Experiments 1 and 2**

The experiments included two exploratory Fear of Missing Out (FoMO5) self-report items that were collected at baseline and after the academic preparation self-control context. The five-scale items (1 = “not at all” to 5 = “Extremely”) referred to two aspects of FoMO were: “At the moment, while you are not connected to your social-media account, how much are you worried about missing positive experiences related to others6/you?”.

**Note 8: Further information on the Social-media usage experimental manipulation subsection of Experiment 3**

The social-media usage experimental manipulation in Experiment 3 included two parts that were performed on participants’ computers.

Instructions for the first six-minute part of the experimental manipulation included explaining to participants in the scrolling condition that they would be asked to scroll through social-media content created by others, and explaining to participants in both the public-posting and private-posting conditions that they would be asked to create original and personal social-media content. During the instructional phase of the first part, participants in both posting conditions were equally told they would be required to privately broadcast their social-media content. However, to enhance the commitment to create meaningful content participants were rightfully told that at a later point in the experiment, their content would be publicly published.

Prior to starting the first six-minute part of the experimental manipulation, we ensured participants' understanding of the experimental manipulation instructions, by asking them to respond to several questions Specifically, in addition to the three questions presented in Experiments 1 and 2 (regarding the activities they should perform and avoid doing on their social-media accounts under the posting and scrolling conditions, see Note 3 in Supplementary Method), participants in the posting conditions were asked to answer two additional questions: (A) In the initial phase of the experiment, how were you instructed to publish your social-media content? (where a correct response was "to publish the content privately"); (B) Later in the experiment, how were you instructed to publish your social-media content? (where a correct response was "to publish the content publicly"). A judge who read all answers confirmed that all participants understood the manipulation instructions.

After confirming the participants' understanding of the manipulation instructions, participants performed the first six-minute part of the experimental manipulation. Similar to Experiments 1 and 2, we verified that during this time participants were mainly in their Facebook account. Continuous usage data confirmed that during the first six-minute experimental manipulation, the participants were in their Facebook accounts for an average of 04:57 minutes (SD = 02:30 minutes).

Following the completion of the first six-minute part of the experimental manipulation, participants received instructions for the second three-minute part. This part was designed to experimentally manipulate opportunities to receive social-feedback between the two posting conditions. Specifically, participants in the public-posting condition were told they would be asked to change their privately created content to public, allowing opportunities to receive social-feedback (since their Facebook friends could now see and respond to their content). In contrast, participants in the private-posting condition were told they would be asked to review their privately created content and ensure its privacy, thereby persisting to block opportunities to receive social-feedback (since as long as their content appears as private, no one can see and respond to it). To equate the duration of the second three-minute part of the experimental manipulation, participants in the scrolling condition were told they would be asked to review the social-media content they consumed during the first six-minute of the experimental manipulation[[1]](#footnote-1).

Immediately after the instruction phase, participants performed the second three-minute part of the experimental manipulation. Here too, we verified that during the second three-minute part of the experimental manipulation, participants were mainly in their Facebook account. Continuous usage data confirmed that during the three-minute experimental manipulation, the participants were in their Facebook account for an average of 02:11 minutes (SD = 01:11 minutes).

**Table 2: Social-media usage experimental manipulation instructions of Experiment 3**

Table 2 presents the two-part experimental instructions for the three conditions in Experiment 3. Note that the instructions for the first six-minute experimental manipulation in both public-posting and private-posting conditions were similar. The distinction between these two posting conditions was made in the second three-minute part.

| **Manipulation instructions of Experiment 3** | | | |
| --- | --- | --- | --- |
| **Part** | **Public-posting Instruction** | **Private-posting Instruction** | **Scrolling Instruction** |
| Part 1 (6 minutes) | Many factors contribute to Facebook’s popularity, but some studies suggest that one of the key reasons for Facebook’s popularity is that it **enables users to easily create and share content with their social world.**  **For example, Facebook enables users to upload status, photos, stories, videos, etc., and share them with their social world.** Many people report that they can easily connect to and experience their social world **by posting**. For the next 6 minutes, we ask you to use Facebook only for **posting.** Specifically,for **creating and publicly publishing personal and original content.** For example, **you can post original images, change your profile picture, upload videos, stories, or verbal content.** Note that you are asked to **post** 3 contents.  In addition, we ask you to use Facebook only for **posting** and refrain from other activities such as **scrolling through your news feed, look at your friends’ profiles, enter groups or pages you follow, and view pictures.** Refrain also from sharing non-original content, commenting, and reacting to friends, and clicking on any links that will lead to non-Facebook sites.  **Please note, at the initial part you will publish the content you created privately, so that only you can see the content you created, and other people cannot. However, you will later publish the content you created publicly so that other people will see the content you created and can comment on it** | Many factors contribute to Facebook’s popularity, but some studies suggest that one of the key reasons for Facebook’s popularity is that it **enables users to easily create and share content with their social world.**  **For example, Facebook enables users to upload status, photos, stories, videos, etc., and share them with their social world.** Many people report that they can easily connect to and experience their social world **by posting**. For the next 6 minutes, we ask you to use Facebook only for **posting.** Specifically,for **creating and publicly publishing personal and original content.** For example, **you can post original images, change your profile picture, upload videos, stories, verbal content.** Note that you are asked to **post** 3 contents.  In addition, we ask you to use Facebook only for **posting** and refrain from other activities such as **scrolling through your news feed, look at your friends’ profiles, enter groups or pages you follow, and view pictures.** Refrain also from sharing non-original content, commenting, and reacting to friends, and clicking on any links that will lead to non-Facebook sites.  **Please note, at the initial part you will publish the content you created privately, so that only you can see the content you created, and other people cannot. However, you will later publish the content you created publicly so that other people will see the content you created and can comment on it** | Many factors contribute to Facebook’s popularity, but some studies suggest that one of the key reasons for Facebook’s popularity is that it **allows people to browse their social world and stay updated.**  **For example, Facebook enables users to scroll through the news feed, looking at friends’ posts, pictures, videos, etc.**  Many people report that they can easily connect to and experience their social world through **scrolling**. For the next 6 minutes, we ask you to use Facebook only for **scrolling.**  Specifically, for **viewing content created by others.**  For example, **you can scroll through your news feed, look at your friends’ profiles, enter groups or pages you follow, and view pictures.**  Note that you are asked to **scroll through (at least)** 3 contents.  In addition, we ask you to use Facebook only for **scrolling** and refrain from other activities such as **posting original images, change your profile picture, upload videos, stories, or verbal content.**  Refrain also from sharing non-original content, commenting, and reacting to friends, and clicking on any links that will lead to non-Facebook sites |
| Part 1 (3 minutes) | For the next 3 minutes, we ask you to **change the privacy settings for the content you created so that it will be published publicly.**  **Changing your privacy settings will allow** other Facebook users **to** see, comment, share, or like content you have created | For the next 3 minutes, we ask you to **review the content you created and make sure it is defined as private.**  **As long as your content appears as private,** other Facebook users **cannot** see, comment, share, or like the content you created | For the next 3 minutes, we ask you to **review the content you have consumed.**  **Since you did not upload any content yourself during the experiment, you do not have any posted content that** other Facebook users **can** see, comment, share or like |
| Note: Bolded text reflects aspects of the manipulation that differ between conditions | | | |

**Note 9: Further information on the Academic preparation self-control context subsection of Experiment 3**

Prior to the reading of the academic text, participants received verbal reminders regarding the experimental condition they were in. Specifically, participants in the public-posting condition were rightfully reminded that the content they created was posted publicly, and that their Facebook friends can see and respond to it. In contrast, participants in the private-posting condition were rightfully reminded that the content they created was posted privately, and that no one can see and respond to it. Participants in the scrolling condition were rightfully reminded that they do not have newly posted content that their friends can see and respond to.

**Supplementary Results**

**Note 1: Additional analyses in Experiment 3**

In the main text of Experiment 3 we presented two theory-driven *non orthogonal* contrasts that involve comparing the scrolling reference condition, once to public-posting condition and once to the private-posting condition. To provide additional supporting evidence, we present supplementary *orthogonal* contrasts, that provide independent linear comparisons between the three groups of the independent social-media usage variable. In addition, we also report another contrast directly comparing the public-posting and private-posting conditions.

To examine orthogonal contrasts, we conducted indirect effect analyses (used Hayes PROCESS version 4.0, Model 47) with conventional 10,000 iterations, 80% power, and 97.5% confidence level. Given that the independent variable has three (rather than two) levels (i.e., scrolling, public-posting, private-posting), we used Helmert coding to create two orthogonal contrasts for the multi-categorical variable. Specifically, contrast was defined as a comparison between private-posting and scrolling condition. contrast that provides independent linear comparisons was defined as a comparison between public-posting, and both private-posting and scrolling conditions.

In all the analyses, the orthogonal contrasts of the experimentally manipulated social-media usage were the independent variable and procrastinatory social-media usage index was the mediator variable. Given that we had three different outcomes (test grades, positive affect, and negative affect), we conducted three main separate models, one for each dependent variable.

Fully supporting the analysis presented in the main text of Experiment 3, in the first contrast we demonstrated that relative to scrolling, private-posting (that blocks opportunities to receive strong social-feedback), did not lead to enhanced procrastinatory social-media usage and its maladaptive consequences, as reflected in non-significant indirect models (Academic Performance model: = -.041 SE = .060, 97.5% CI [-.209, .070], Positive Affect model: = -.073, SE = .095, 97.5% CI [-.289, .142], and Negative Affect model: = .076 SE = .098, 97.5% CI [-.148, .300]). Further supporting our account in contrast we demonstrated that relative to both private-posting and scrolling (that did not differ statistically), public-posting (that allows opportunities to receive social-feedback) led to enhanced procrastinatory social-media usage which in turn was associated with reduced Academic Performance (= -.126, SE =.058, 97.5% CI [-.271, -.005]), reduced Positive Affect ( = -.222, SE = .092, 97.5% CI [-.427, -.017]), and enhanced Negative Affect (= .230, SE = .099, 97.5% CI [.015, .463]). These analyses indicate that the public-posting condition leads to negative consequences relative to the combination of the private-posting and scrolling conditions that do not differ from each other.

Beyond these supporting analyses, we wished to also examine whether the public-posting condition differed from the private-posting condition. In a preliminary phase of model testing, we found that although in the expected direction, public-posting relative to private-posting led to only marginally significant enhanced procrastinatory social-media usage (β = .356, SE = .196, t (148) = 1.671, p = .096, 97.5% CI [-.116, .773]). Given that the relationship between this independent variable and mediator was only marginally significant, we adopted a conservative approach of not completing full indirect models8.

**Note 2: Technical information of the statistical analyses in Experiments 1 and 2**

The statistical analysis in both experiments included entering the following parameters into the PROCESS SPSS (version 4.0) program: Social-media usage manipulation condition (posting or scrolling) as the independent variable; Procrastinatory social-media usage as the mediator variable; Test grades, Positive affect, and Negative affect as the dependent variables (in three separate models); Model number 4; 95% confidence interval; 10,000 bootstrap samples; Checked V for “Bootstrap inference for model coefficients”; Checked V for “Show total effect model”; Checked V for “standardized effect”; HC4 cribari neto; 4 decimal placed in output; Mean center only for continuous variables.

**Note 3: Technical information of the statistical analyses in Experiment 3**

The statistical analysis included entering the following parameters into the PROCESS SPSS (version 4.0) program: Social-media usage manipulation condition and as the independent variable; Procrastinatory social-media usage as the mediator variable; Test grades, positive affect, and negative affect as the dependent variables (in three separate models); Model number 4; 97.5% confidence interval; 10,000 bootstrap samples; Checked V for “Bootstrap inference for model coefficients”; Checked V for “Show total effect model”; Checked V for “standardized effects”; HC4 cribari neto; 4 decimal placed in output; Mean center only for continuous variables; Checked V for the multi-categorical independent variable and selected “indicator coding”[[2]](#footnote-2).

**References**

1 Qualtrics (Provo, Utah, USA, 2005).

2 App Usage (Google Play Store, 2021).

3 TimeYourWeb v. 1.0.21 (Chrome Web Store, 2021).

4 Rechtman, O. *The foundation of the forest resource in Israel: policies, actions and results from the beginning of the afforestation until 1960*, <https://www.kkl.org.il/forest-online-journal/yaar-18/hitbasesut-mashab-hayaar.aspx> (2017).

5 Przybylski, A. K., Murayama, K., DeHaan, C. R. & Gladwell, V. Motivational, emotional, and behavioral correlates of fear of missing out. *Computers in human behavior* **29**, 1841-1848 (2013).

6 Riordan, B. C. *et al.* The development of a single item FoMO (Fear of Missing Out) scale. *Current Psychology* **39**, 1215-1220 (2020). <https://doi.org:10.1007/s12144-018-9824-8>

7 Hayes, A. F. (University of Kansas, KS, 2012).

8 Baron, R. M. & Kenny, D. A. The moderator–mediator variable distinction in social psychological research: Conceptual, strategic, and statistical considerations. *Journal of personality and social psychology* **51**, 1173 (1986).

1. To make it possible for scrolling participants to review the contents they consumed earlier, participants took screenshots of the social-media content they consumed during the first part of the manipulation. [↑](#footnote-ref-1)
2. For the additional analyses in Experiment 3 (Note 1 in Supplementary Result) we selected “Helmert coding”. [↑](#footnote-ref-2)
